# Supplementary material
Source: HighWire-hosted journal article supplement (http://www.ajnr.org/highwire/filestream/52785/field_highwire_adjunct_files/0/15-00772.pdf)
Supplement: 15-00772.pdf [file 15-00772.pdf]

**On-line Table: Comparison of key outcomes (efficacy and safety) among trials**

|                                   | ESCAPE                           |                                   | MR CLEAN                          |                                   | SWIFT-PRIME           |                       | EXTEND-IA                      |                                  | REVASCAT                         |                                  |
|-----------------------------------|----------------------------------|-----------------------------------|-----------------------------------|-----------------------------------|-----------------------|-----------------------|--------------------------------|----------------------------------|----------------------------------|----------------------------------|
|                                   | Treatment Group                  | Control Group                     | Treatment Group                   | Control Group                     | Treatment Group       | Control Group         | Treatment Group                | Control Group                    | Treatment Group                  | Control Group                    |
| mRS score at 90 days (median)     | 2                                | 4                                 | 3 (2-5)                           | 4 (3-5)                           | 2 (1-4)               | 3 (2-5)               | 1 (0-3)                        | 3 (1-5)                          | NA                               | NA                               |
|                                   | Adjusted common odds ratio = 3.1 | Adjusted common odds ratio = 1.67 | Adjusted common odds ratio = 1.67 | Adjusted common odds ratio = 1.67 | $P < .001$            | $P < .001$            | Adjusted common odds ratio = 2 | Adjusted common odds ratio = 1.7 | Adjusted common odds ratio = 1.7 | Adjusted common odds ratio = 1.7 |
| NNT                               | 3.1                              | 7                                 | 7                                 | 7                                 | 2.6                   | 2.6                   | 3                              | 3                                | NA                               | NA                               |
| mRS 0-2 at 90 days                | 53%                              | 29.3%                             | 32.6%                             | 19.1%                             | 60%                   | 35%                   | 71%                            | 40%                              | 43.7%                            | 28.2%                            |
|                                   | $P < .001$                       | $P < .001$                        |                                   |                                   | $P < .001$            | $P < .001$            | $P = .01$                      |                                  |                                  |                                  |
| Revascularization rates           | 3.6%                             | 2.7%                              | 7.7%                              | 6.4%                              | 0%                    | 3%                    | 0%                             | 6%                               | 1.9%                             | 19%                              |
| SICH                              | 72.4%                            | 72.4%                             | 58.7%                             | 58.7%                             | 88%                   | 88%                   | 86.2%                          | 86.2%                            | 65.7%                            | 65.7%                            |
|                                   | $P = .75$                        | $P = .75$                         |                                   |                                   | $P = .12$             | $P = .12$             | $P = .49$                      | $P = .49$                        |                                  |                                  |
| Mortality                         | 10.4%                            | 19%                               | 18.9%                             | 18.4%                             | 9%                    | 12%                   | 9%                             | 20%                              | 18.4%                            | 15.5%                            |
|                                   | At 90 days, $P = .04$            | At 90 days, $P = .04$             | At 30 days, 11.1%                 | At 30 days, 11.1%                 | At 90 days, $P = .50$ | At 90 days, $P = .50$ | $P = .18$                      | $P = .18$                        |                                  |                                  |
| Procedural nonfatal complications | 11.9%                            | 11.9%                             | 11.1%                             | 11.1%                             | 7.1%                  | 7.1%                  | 14%                            | 14%                              | 29.4%                            | 29.4%                            |

**Note:**—NNT indicates number needed to treat; SICH, symptomatic intracerebral hemorrhage; NA, not applicable.
